# Supplementary material
Source: publisher figshare collection journal article supplement (https://gsajournals.figshare.com/ndownloader/files/28321923)
Supplement: Supplementary file 1 [file 28321923]

## Sheet: Table S9
Table S9 The pathway terms identified
Class		大类	小类
Cellular Processes	Cell growth and death
Cellular Processes	Cell growth and death
Cellular Processes	Cell growth and death		3
Cellular Processes	Transport and catabolism
Cellular Processes	Transport and catabolism
Cellular Processes	Transport and catabolism
Cellular Processes	Transport and catabolism	7	4
Environmental Information Processing	Membrane transport
Environmental Information Processing	Membrane transport
Environmental Information Processing	Membrane transport		3
Environmental Information Processing	Signal transduction
Environmental Information Processing	Signal transduction
Environmental Information Processing	Signal transduction
Environmental Information Processing	Signal transduction
Environmental Information Processing	Signal transduction
Environmental Information Processing	Signal transduction
Environmental Information Processing	Signal transduction
Environmental Information Processing	Signal transduction
Environmental Information Processing	Signal transduction
Environmental Information Processing	Signal transduction
Environmental Information Processing	Signal transduction
Environmental Information Processing	Signal transduction
Environmental Information Processing	Signal transduction
Environmental Information Processing	Signal transduction
Environmental Information Processing	Signal transduction
Environmental Information Processing	Signal transduction
Environmental Information Processing	Signal transduction
Environmental Information Processing	Signal transduction
Environmental Information Processing	Signal transduction	22	19
Genetic Information Processing	Replication and repair
Genetic Information Processing	Replication and repair
Genetic Information Processing	Replication and repair
Genetic Information Processing	Replication and repair
Genetic Information Processing	Replication and repair
Genetic Information Processing	Replication and repair
Genetic Information Processing	Replication and repair
Genetic Information Processing	Replication and repair		8
Genetic Information Processing	Translation
Genetic Information Processing	Translation
Genetic Information Processing	Translation	11	3
Metabolism	Amino acid metabolism
Metabolism	Amino acid metabolism
Metabolism	Amino acid metabolism
Metabolism	Amino acid metabolism		4
Metabolism	Biosynthesis of other secondary metabolites
Metabolism	Biosynthesis of other secondary metabolites
Metabolism	Biosynthesis of other secondary metabolites
Metabolism	Biosynthesis of other secondary metabolites
Metabolism	Biosynthesis of other secondary metabolites
Metabolism	Biosynthesis of other secondary metabolites
Metabolism	Biosynthesis of other secondary metabolites
Metabolism	Biosynthesis of other secondary metabolites
Metabolism	Biosynthesis of other secondary metabolites
Metabolism	Biosynthesis of other secondary metabolites
Metabolism	Biosynthesis of other secondary metabolites		11
Metabolism	Carbohydrate metabolism
Metabolism	Carbohydrate metabolism
Metabolism	Carbohydrate metabolism
Metabolism	Carbohydrate metabolism
Metabolism	Carbohydrate metabolism
Metabolism	Carbohydrate metabolism
Metabolism	Carbohydrate metabolism
Metabolism	Carbohydrate metabolism
Metabolism	Carbohydrate metabolism
Metabolism	Carbohydrate metabolism
Metabolism	Carbohydrate metabolism
Metabolism	Carbohydrate metabolism
Metabolism	Carbohydrate metabolism
Metabolism	Carbohydrate metabolism
Metabolism	Carbohydrate metabolism
Metabolism	Carbohydrate metabolism
Metabolism	Carbohydrate metabolism
Metabolism	Carbohydrate metabolism		18
Metabolism	Energy metabolism
Metabolism	Energy metabolism
Metabolism	Energy metabolism		3
Metabolism	Glycan biosynthesis and metabolism
Metabolism	Glycan biosynthesis and metabolism
Metabolism	Glycan biosynthesis and metabolism
Metabolism	Glycan biosynthesis and metabolism		4
Metabolism	Lipid metabolism
Metabolism	Lipid metabolism
Metabolism	Lipid metabolism
Metabolism	Lipid metabolism
Metabolism	Lipid metabolism
Metabolism	Lipid metabolism
Metabolism	Lipid metabolism
Metabolism	Lipid metabolism
Metabolism	Lipid metabolism
Metabolism	Lipid metabolism
Metabolism	Lipid metabolism
Metabolism	Lipid metabolism
Metabolism	Lipid metabolism
Metabolism	Lipid metabolism
Metabolism	Lipid metabolism
Metabolism	Lipid metabolism
Metabolism	Lipid metabolism
Metabolism	Lipid metabolism
Metabolism	Lipid metabolism
Metabolism	Lipid metabolism
Metabolism	Lipid metabolism
Metabolism	Lipid metabolism		22
Metabolism	Metabolism of cofactors and vitamins
Metabolism	Metabolism of cofactors and vitamins
Metabolism	Metabolism of cofactors and vitamins
Metabolism	Metabolism of cofactors and vitamins
Metabolism	Metabolism of cofactors and vitamins
Metabolism	Metabolism of cofactors and vitamins
Metabolism	Metabolism of cofactors and vitamins
Metabolism	Metabolism of cofactors and vitamins
Metabolism	Metabolism of cofactors and vitamins
Metabolism	Metabolism of cofactors and vitamins
Metabolism	Metabolism of cofactors and vitamins		11
Metabolism	Metabolism of other amino acids
Metabolism	Metabolism of other amino acids
Metabolism	Metabolism of other amino acids
Metabolism	Metabolism of other amino acids
Metabolism	Metabolism of other amino acids
Metabolism	Metabolism of other amino acids
Metabolism	Metabolism of other amino acids
Metabolism	Metabolism of other amino acids		8
Metabolism	Metabolism of terpenoids and polyketides
Metabolism	Metabolism of terpenoids and polyketides
Metabolism	Metabolism of terpenoids and polyketides
Metabolism	Metabolism of terpenoids and polyketides
Metabolism	Metabolism of terpenoids and polyketides
Metabolism	Metabolism of terpenoids and polyketides
Metabolism	Metabolism of terpenoids and polyketides		7
Metabolism	Nucleotide metabolism		1
Metabolism	Overview
Metabolism	Overview	91	2
Organismal Systems	Endocrine system		1
Organismal Systems	Environmental adaptation
Organismal Systems	Environmental adaptation
Organismal Systems	Environmental adaptation
Organismal Systems	Environmental adaptation
Organismal Systems	Environmental adaptation
Organismal Systems	Environmental adaptation
Organismal Systems	Environmental adaptation	8	7
